# Supplementary material
Source: Springer Nature journal article supplement (https://www.springermedizin.de/resource/supplementary/12991_2013_1366_MOESM1_ESM.pdf/9613810)

# Canonical Discriminant Functions

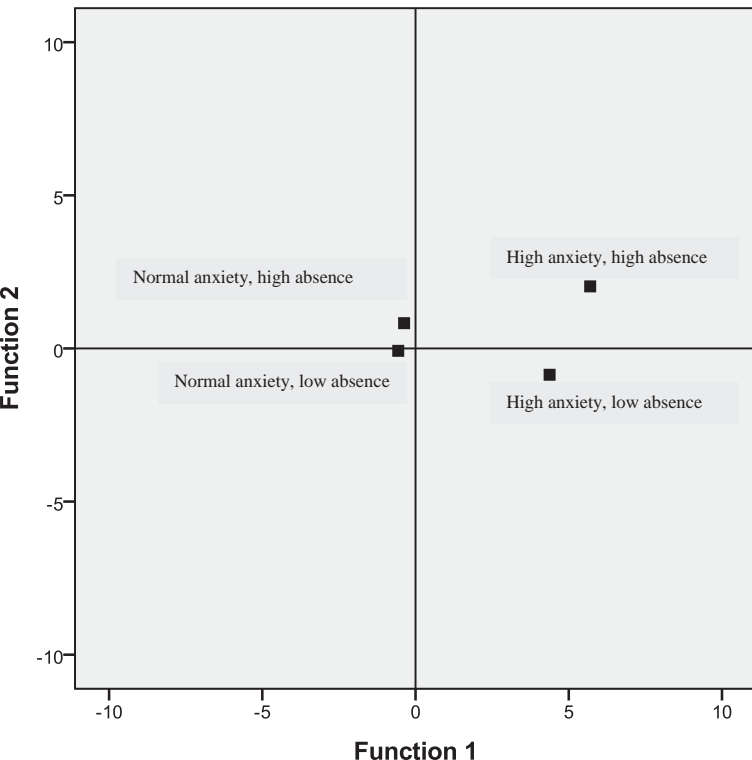

Supplement: MOESM1 [file 9613810]
